# Supplementary material
Source: PubMed Central journal article supplement (PMC8603072)
Supplement: mmc1.pdf [file mmc1.pdf]

**Cell, Volume 184**

**Supplemental information**

**Population impact of SARS-CoV-2 variants  
with enhanced transmissibility  
and/or partial immune escape**

**Mary Bushman, Rebecca Kahn, Bradford P. Taylor, Marc Lipsitch, and William P. Hanage**

**Table S1.** Simulations under default model configuration; related to STAR Methods. Variants are abbreviated V0, V1, etc.

| Set | Strain(s) | Start of vaccine rollout ( $\tau_{vax}$ ) | Duration of vaccine rollout ( $\frac{1}{v}$ ) | Variant transmission advantage ( $\lambda$ ) | Cross-reactivity ( $\phi$ ) |
|-----|-----------|-------------------------------------------|-----------------------------------------------|----------------------------------------------|-----------------------------|
| 1   | W + V0    | NA                                        | NA                                            | 0                                            | 1                           |
| 2   | W + V1    | NA                                        | NA                                            | 0.6                                          | 1                           |
| 3   | W + V2    | NA                                        | NA                                            | 0                                            | 0.6                         |
| 4   | W + V3    | NA                                        | NA                                            | 0.6                                          | 0.6                         |
| 5   | W + V0    | 9-18 mos                                  | 3-12 mos                                      | 0                                            | 1                           |
| 6   | W + V1    | 9-18 mos                                  | 3-12 mos                                      | 0.6                                          | 1                           |
| 7   | W + V2    | 9-18 mos                                  | 3-12 mos                                      | 0                                            | 0.6                         |
| 8   | W + V3    | 9-18 mos                                  | 3-12 mos                                      | 0.6                                          | 0.6                         |

**Table S2.** Alternative scenarios with weakened control measures; related to STAR Methods.

| Description      | NPIs relaxed            | Vaccine coverage ( $c$ ) | Vaccine efficacy ( $\omega$ ) |
|------------------|-------------------------|--------------------------|-------------------------------|
| Lifting NPIs     | At 50% vaccine coverage | 100%                     | 95%                           |
| Reduced coverage | No                      | 50%                      | 95%                           |
| Reduced efficacy | No                      | 100%                     | 70%                           |
| Combination      | At 50% vaccine coverage | 50%                      | 70%                           |
